# Supplementary material for: High-Fiber Diet or Combined With Acarbose Alleviates Heterogeneous Phenotypes of Polycystic Ovary Syndrome by Regulating Gut Microbiota
Source: Front Endocrinol (Lausanne). 2022 Feb 2;12:806331. doi: 10.3389/fendo.2021.806331 (PMC8847200; doi:10.3389/fendo.2021.806331)
Supplement: Supplementary file 2 [file Table_3.xlsx]

## Sheet: Sheet1
ASV ID	CAG ID	Taxon
ASV491	CAG1	g__Faecalibacterium
ASV1624	CAG1	s__Dorea_formicigenerans
ASV1181	CAG1	g__Dorea
ASV722	CAG1	g__Lachnospiraceae_ND3007_group
ASV333	CAG1	g__Blautia
ASV1354	CAG1	g__Blautia
ASV1214	CAG1	g__Agathobacter
ASV1245	CAG1	g__Subdoligranulum
ASV252	CAG1	g__Faecalibacterium
ASV1286	CAG1	g__Faecalibacterium
ASV1348	CAG1	g__Subdoligranulum
ASV1091	CAG1	f__Lachnospiraceae CAG-56
ASV413	CAG1	g__Lachnospiraceae_NK4A136_group
ASV371	CAG2	g__[Eubacterium]_hallii_group
ASV153	CAG2	g__Collinsella
ASV274	CAG2	f__Lachnospiraceae
ASV1293	CAG2	g__Coprococcus
ASV455	CAG2	g__Blautia
ASV125	CAG2	s__Bacteroides_coprocola
ASV110	CAG2	g__Parasutterella
ASV1270	CAG2	g__[Ruminococcus]_gauvreauii_group
ASV221	CAG2	s__Bacteroides_plebeius
ASV238	CAG3	s__Parabacteroides_distasonis
ASV627	CAG3	g__[Eubacterium]_ventriosum_group
ASV449	CAG3	s__Bifidobacterium_adolescentis
ASV1710	CAG3	g__Lachnospiraceae_UCG-004
ASV529	CAG3	s__Dialister_sp.
ASV1430	CAG3	s__Bifidobacterium_longum
ASV1407	CAG3	g__Lachnospira
ASV1675	CAG3	s__Bifidobacterium_bifidum
ASV1305	CAG4	f__Oscillospiraceae UCG-002
ASV1447	CAG4	f__Oscillospiraceae NK4A214_group
ASV1328	CAG4	g__Christensenellaceae_R-7_group
ASV524	CAG4	g__Subdoligranulum
ASV68	CAG4	g__Clostridia_UCG-014
ASV369	CAG4	g__[Eubacterium]_coprostanoligenes_group
ASV1593	CAG4	g__[Eubacterium]_coprostanoligenes_group
ASV204	CAG4	s__Parabacteroides_distasonis
ASV1620	CAG4	g__Coprococcus
ASV1534	CAG5	g__Butyricicoccus
ASV405	CAG5	f__Lachnospiraceae
ASV1038	CAG5	s__Bacteroides_uniformis
ASV414	CAG5	g__Incertae_Sedis
ASV971	CAG5	g__Prevotella
ASV1287	CAG5	g__Holdemanella
ASV742	CAG5	g__Prevotella
ASV337	CAG5	g__Paraprevotella
ASV1022	CAG5	s__Ruminococcus_callidus
ASV1004	CAG5	g__Catenibacterium
ASV1191	CAG6	g__Blautia
ASV554	CAG6	s__Parabacteroides_merdae
ASV782	CAG6	s__Bacteroides_uniformis
ASV502	CAG6	g__Monoglobus
ASV1405	CAG6	g__Bacteroides
ASV81	CAG6	g__Oscillibacter
ASV172	CAG6	g__Lachnospiraceae_NK4A136_group
ASV959	CAG6	f__Ruminococcaceae
ASV1077	CAG7	g__Fusicatenibacter
ASV351	CAG7	g__Anaerostipes
ASV694	CAG7	g__Butyricicoccus
ASV776	CAG7	f__Lachnospiraceae
ASV168	CAG7	g__[Eubacterium]_eligens_group
ASV1587	CAG7	s__Ruminococcus_bicirculans
ASV160	CAG7	g__Butyricicoccus
ASV961	CAG7	s__Parabacteroides_distasonis
ASV115	CAG7	g__Sutterella
ASV691	CAG8	s__Bacteroides_vulgatus
ASV1382	CAG8	g__Lachnoclostridium
ASV592	CAG8	g__[Eubacterium]_hallii_group
ASV1369	CAG8	g__Alistipes
ASV245	CAG8	s__Alistipes_onderdonkii
ASV1497	CAG8	g__Butyricicoccus
ASV407	CAG9	s__Odoribacter_splanchnicus
ASV92	CAG9	g__Bilophila
ASV522	CAG9	f__Oscillospiraceae UCG-002
ASV1535	CAG9	f__Oscillospiraceae UCG-003
ASV718	CAG9	s__Megamonas_funiformis
ASV1681	CAG9	g__Agathobacter
ASV47	CAG9	g__Lachnospiraceae_FCS020_group
ASV1123	CAG9	s__Odoribacter_splanchnicus
ASV1175	CAG9	f__Oscillospiraceae UCG-003
ASV1571	CAG10	g__Lachnospira
ASV269	CAG10	g__Lachnoclostridium
ASV1516	CAG10	g__Romboutsia
ASV1323	CAG10	g__Coprococcus
ASV1080	CAG10	g__Intestinibacter
ASV331	CAG10	g__Anaerostipes
ASV865	CAG10	g__Roseburia
ASV1711	CAG10	s__Phascolarctobacterium_faecium
ASV1485	CAG10	g__Roseburia
ASV1646	CAG10	s__Bacteroides_stercoris
ASV1656	CAG10	g__Clostridium_sensu_stricto_1
ASV1565	CAG10	s__Parabacteroides_distasonis
ASV1729	CAG11	g__Escherichia-Shigella
ASV459	CAG11	s__Streptococcus_salivarius
ASV394	CAG11	s__Bifidobacterium_longum
ASV1324	CAG11	g__Bifidobacterium
ASV178	CAG11	s__Haemophilus_parainfluenzae
ASV1209	CAG11	g__Incertae_Sedis
ASV93	CAG11	s__Lactobacillus_mucosae
ASV143	CAG11	g__Streptococcus
ASV1453	CAG11	g__Veillonella
ASV262	CAG11	g__Veillonella
ASV436	CAG11	s__Bifidobacterium_breve
ASV1463	CAG11	g__Veillonella
ASV978	CAG12	g__Blautia
ASV806	CAG12	s__Bacteroides_thetaiotaomicron
ASV1552	CAG12	g__Tyzzerella
ASV126	CAG12	g__[Ruminococcus]_gnavus_group
ASV533	CAG12	s__Bacteroides_dorei
ASV998	CAG12	s__Bacteroides_caccae
ASV1060	CAG12	g__Flavonifractor
ASV876	CAG12	g__Lachnoclostridium
ASV1282	CAG12	g__[Ruminococcus]_torques_group
ASV149	CAG12	s__Bacteroides_ovatus
ASV1096	CAG12	f__Lachnospiraceae
ASV1005	CAG13	g__[Ruminococcus]_torques_group
ASV411	CAG13	g__Agathobacter
ASV1672	CAG13	g__[Eubacterium]_eligens_group
ASV53	CAG13	g__[Ruminococcus]_torques_group
ASV175	CAG13	g__[Eubacterium]_eligens_group
ASV1349	CAG14	g__Faecalibacterium
ASV332	CAG14	f__Lachnospiraceae
ASV830	CAG14	f__Lachnospiraceae
ASV1339	CAG14	g__Erysipelotrichaceae_UCG-003
ASV1242	CAG14	s__Bacteroides_vulgatus
ASV1677	CAG14	g__Lachnospira
ASV234	CAG14	g__Lachnoclostridium
ASV587	CAG14	s__Bacteroides_ovatus
ASV1448	CAG14	s__Bacteroides_vulgatus
ASV918	CAG14	s__Bacteroides_vulgatus
ASV1024	CAG14	g__Blautia
